# Supplementary material
Source: MDPI journal article supplement (https://www.mdpi.com/2073-4433/13/2/244)
Supplement: s1 [file s1]

## Supplementary Materials:

Soulemame Halif Ngagine <sup>1\*</sup>, Karine Deboudt<sup>1</sup>, Pascal Flament<sup>1</sup>, Marie Choël<sup>2</sup>, Pierre Kulinsky<sup>1</sup> and Fabien Marteel<sup>1</sup>.

### Determination of the rotation angle of TRAPS impaction plates

The choice of the rotation angle value in steps of  $28.8^\circ$  is the result of a compromise between the minimum rotation angle, to avoid overlapping between two impaction traces, and technical/mechanical constraints. The device uses two stepper motors (200 steps for  $360^\circ$ , i.e.  $1.8^\circ$  per step). Although the electronic control allows us to drive the motor steps very precisely ( $\pm 0.11^\circ$  per step); this method requires maintenance of a current in the motor coil to keep its axe in position. This produces a heating of the motor blocks and then of the impactor, which can result in a loss of the most volatile particles. To avoid this, we chose to switch off the current after each rotation. When the current is off, the motor axe moves back to a reference position related to its built-in design. This position is found every 4 steps, i.e.,  $1.8^\circ \times 4 = 7.2^\circ$ . A factor  $< 4$  is insufficient to avoid overlapping between two traces. We therefore chose a rotation angle of  $7.2^\circ \times 4 = 28.8^\circ$ .

**Table S1.** Technical characteristics of the TRAPS.

| Name                                 | TRAPS for Time Resolved Atmospheric Particle Sampler                                                                                                                                                                                                                                                                                      |
|--------------------------------------|-------------------------------------------------------------------------------------------------------------------------------------------------------------------------------------------------------------------------------------------------------------------------------------------------------------------------------------------|
| Weight                               | 6.75 kg                                                                                                                                                                                                                                                                                                                                   |
| Dimensions (d × h)                   | 10.2 × 35 cm                                                                                                                                                                                                                                                                                                                              |
| Sample flow                          | 5 L/min                                                                                                                                                                                                                                                                                                                                   |
| Sampling range                       | Fine (PM <sub>0.1-1</sub> ) and Coarse mode particles (PM <sub>1-10</sub> )                                                                                                                                                                                                                                                               |
| Sampling duration                    | Adjustable (minute, hour, day)                                                                                                                                                                                                                                                                                                            |
| Rotation angle                       | $28.8^\circ$ (enables the collection of maximum 12 samples/plate)                                                                                                                                                                                                                                                                         |
| Sampling substrate                   | Whatman Nuclepore™ (or equivalent) track-etched polycarbonate membranes (47 mm diameter and 0.015 µm pore size) or TEM grids                                                                                                                                                                                                              |
| Pump type                            | KNF Laboport N816.18                                                                                                                                                                                                                                                                                                                      |
| Parts of the device (see Figure S1.) | <ul style="list-style-type: none"> <li>• Preimpaction head (Air inlet) (1)</li> <li>• 2 rectangular nozzles: PM<sub>1-10</sub> and PM<sub>0.1-1</sub> (2)</li> <li>• 2 cylindrical blocks (3) (supporting the motors) (4)</li> <li>• 2 collection plates with their 50 mm diameter clips (5)</li> <li>• Cover (air outlet) (6)</li> </ul> |

**Table S2.** Chemical characteristics and possible sources of different types of individual particles.

| Particle Type | Elemental composition                | Main compounds    | Possible source                                                                                                                          |
|---------------|--------------------------------------|-------------------|------------------------------------------------------------------------------------------------------------------------------------------|
| Carbonaceous  | C, O, with minor amounts of N, Si, S | Soot, organics    | Incomplete combustion of biomass or fossil fuel from anthropogenic activities, emissions of volatile and semi-volatile organic compounds |
| S-rich        | S, N, K, O, with minor amounts of    | Ammonium sulfate, | Secondary aerosols formation, Biomass burning for K-rich                                                                                 |

|                        |                                                              |                                                                        |                                                                                 |
|------------------------|--------------------------------------------------------------|------------------------------------------------------------------------|---------------------------------------------------------------------------------|
|                        | C, Si, Al, Na, Ca, Fe                                        | ammonium nitrate, potassium sulfate                                    |                                                                                 |
| Na-rich                | Na, Cl, N, O, with minor amounts of Mg, S, Ca,               | Sodium chloride, sodium nitrates and sulfates, mixed sodium species    | Fresh sea salts, aged marine sea-salts when incorporating N and/or S            |
| Ca-rich                | Ca, C, N, S, O, with minor amounts of Na, Si, Al, K, Fe      | Calcite, gypsum, mixed Ca salts with aluminosilicates or sea salts     | Re-suspended soils, road dust or industrial burning emissions                   |
| Si-Al-rich             | Si, Al, , with minor amounts of Ca, Fe, K, Mg                | Aluminosilicates, silica, mixed silicates (with Ca salts or Fe oxides) | Resuspended sand or road dust, industrial ashes                                 |
| Metals                 | Fe, Mn, Zn, O, with minor amounts of Ti, Si, Al, Ca, K, S, N | Mainly iron, mn and zinc oxydes                                        | Metallurgy, steelworks, coal fire plants, chemical plants and/or oil refineries |
| Unclassified particles |                                                              | Mix of different elements in irrespective proportions                  |                                                                                 |

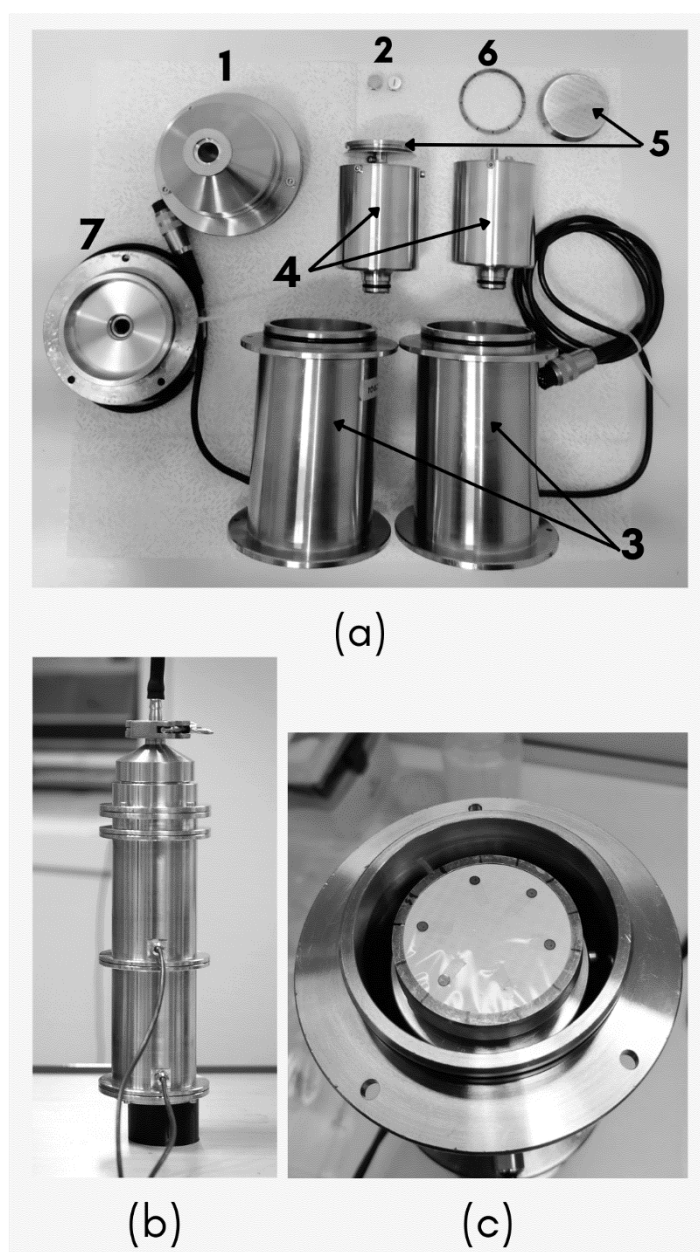

**Figure S1.** Photographs of (a) TRAPS parts, (b) the fully assembled TRAPS, and (c) a collection plate with five TEM grids mounted on a polycarbonate membrane.

```

LOG - Notepad
File Edit Format View Help
1. 2021-04-19 14:43:26 : ligne 1 : cette ligne est un commentaire.
impact 1 : debut le 2021-04-19 18:00:05
2. fin le 2021-04-19 19:00:07
duree : 01:00:02
disque 1 : 1/12 - disque 2 : 1/12

3. impact 2 : debut le 2021-04-19 19:01:00
fin le 2021-04-19 20:01:02
4. duree : 01:00:02
disque 1 : 2/12 - disque 2 : 2/12

impact 3 : debut le 2021-04-19 20:02:01
fin le 2021-04-19 21:02:02
duree : 01:00:01
5. disque 1 : 3/12 6. disque 2 : 3/12 7.
impact 4 : debut le 2021-04-19 21:03:00
fin le 2021-04-19 22:03:02
duree : 01:00:02
disque 1 : 4/12 - disque 2 : 4/12
PM_0.1 stage
PM_1 stage

impact 5 : debut le 2021-04-19 22:04:00
fin le 2021-04-19 23:04:02
duree : 01:00:02
disque 1 : 5/12 - disque 2 : 5/12

impact 6 : debut le 2021-04-19 23:05:00
fin le 2021-04-20 00:05:02
duree : 01:00:02
disque 1 : 6/12 - disque 2 : 6/12

impact 7 : debut le 2021-04-20 00:06:01
fin le 2021-04-20 01:06:02
duree : 01:00:01
disque 1 : 7/12 - disque 2 : 7/12

impact 8 : debut le 2021-04-20 01:07:00
fin le 2021-04-20 02:07:02
duree : 01:00:02
disque 1 : 8/12 - disque 2 : 8/12

impact 9 : debut le 2021-04-20 02:08:00
fin le 2021-04-20 03:08:02
duree : 01:00:02
disque 1 : 9/12 - disque 2 : 9/12

impact 10 : debut le 2021-04-20 03:09:00
fin le 2021-04-20 04:09:02
duree : 01:00:02
disque 1 : 10/12 - disque 2 : 10/12

impact 11 : debut le 2021-04-20 04:10:00
fin le 2021-04-20 06:10:04
duree : 02:00:04
disque 1 : 11/12 - disque 2 : 11/12

```

**Figure S2.** Output file extracted at the end of each TRAPS sampling series. Main information in the colored frames include: 1. date and time of the introduction of the SD card in the command board; 2. sample's (impact) start and end date and time; 3. sample number; 4. sampling duration; 5. rotation of the PM1 stage; 6. rotation of the PM0.1 stage; 7. example of the 3rd out of 12 possible samples.

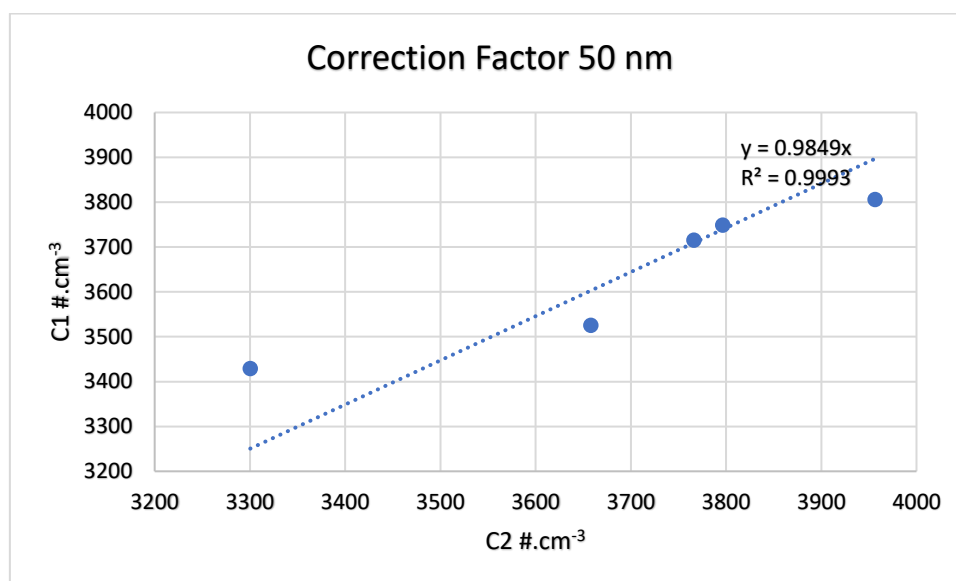

**Figure S3.** Determination of the correction factor between CPC1 and CPC2. A Linear regression was drawn from the different levels of particle number concentrations measured with collocated CPC1 and CPC2.

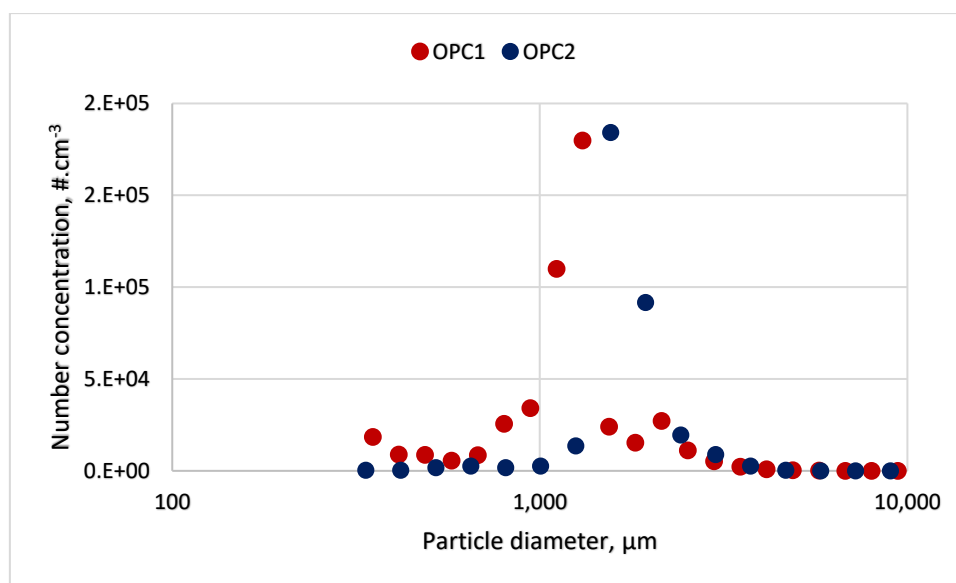

**Figure S4.** Comparison between OPC MiniWRAS Grimm and OPS TSI for particle size distribution. The observed shift is related to the differences in the measurement channels of the two instruments.

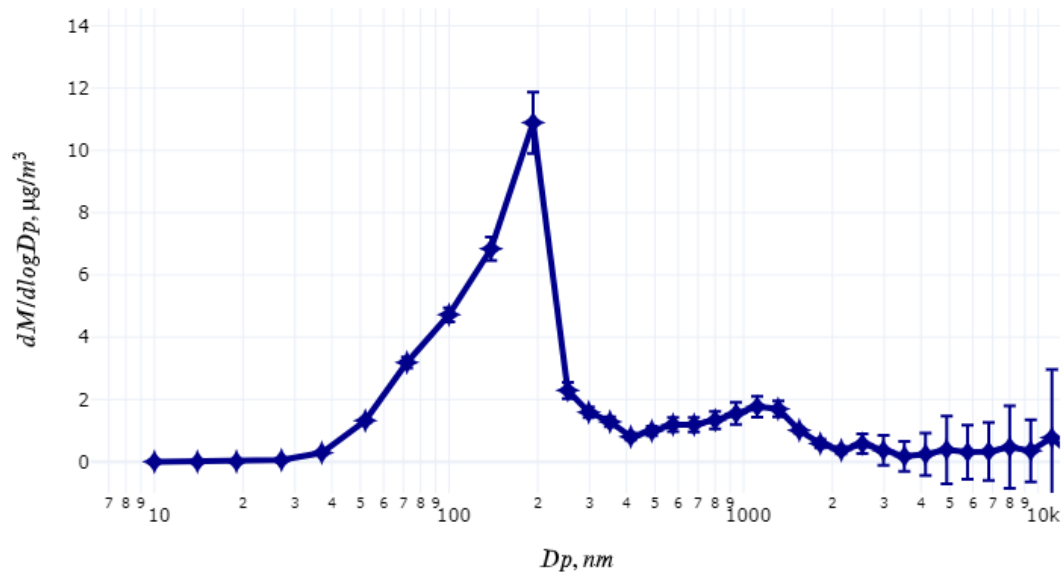

**Figure S5.** Mean particle mass size distribution obtained using an optical particle counter (MiniWRAS model 1371 Grimm™) on June 13<sup>th</sup> 2021 from 08:00 to 10:00 UTC.

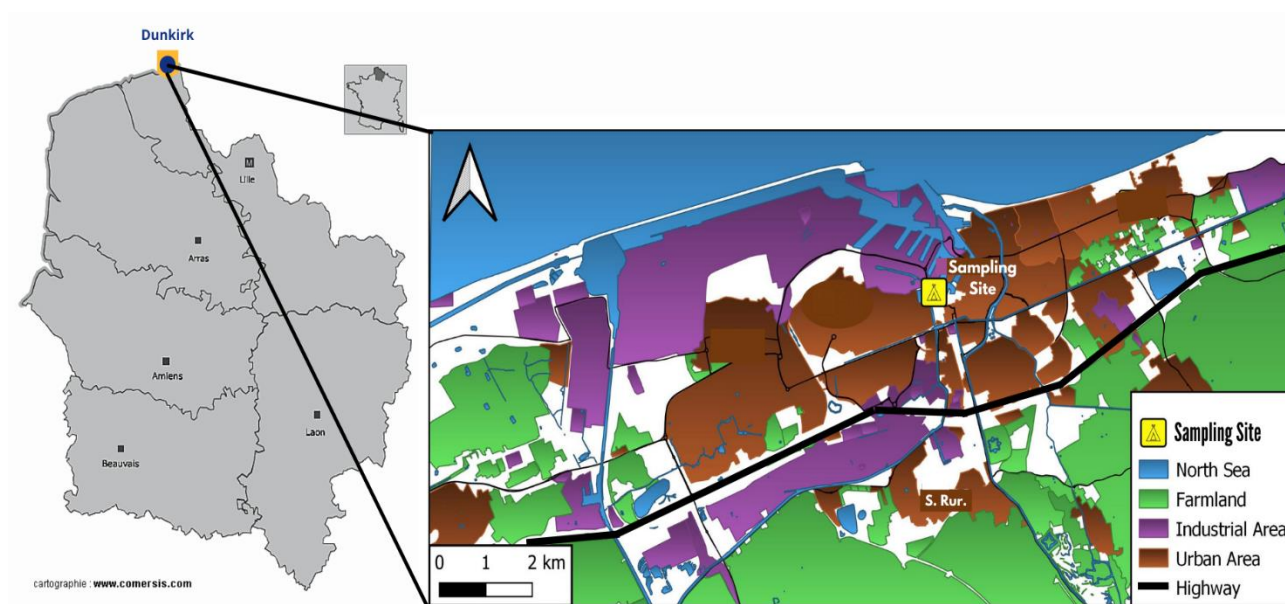

**Figure S6.** Study area.

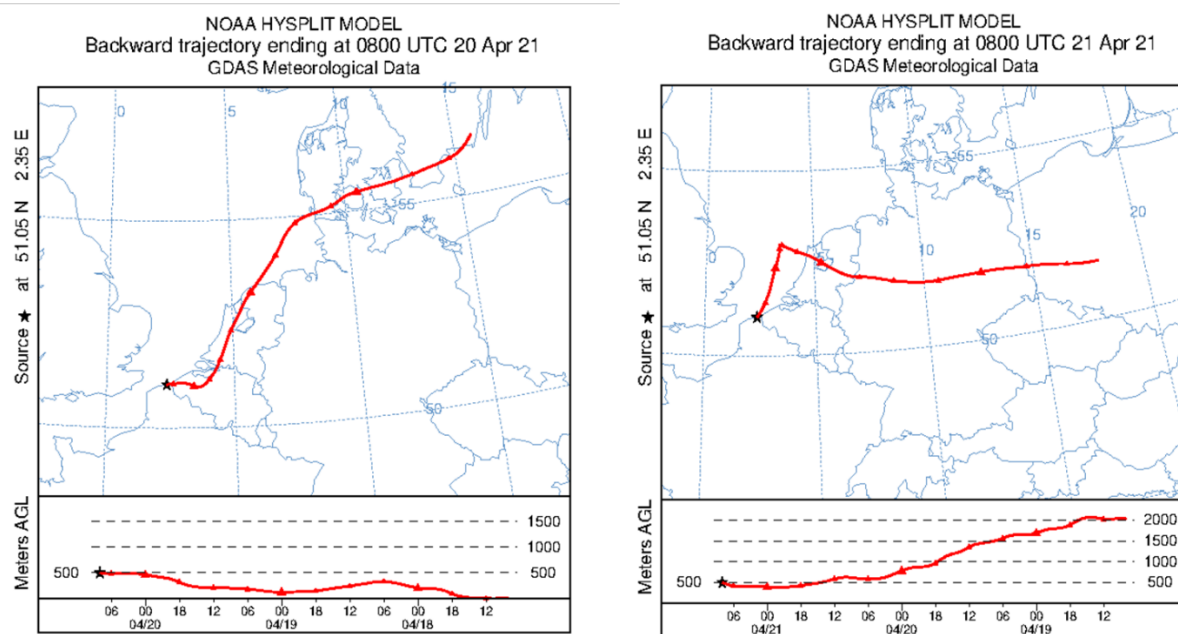

**Figure S7.** 72 hour back-trajectory calculations arriving at 500 m altitude at the sampling site respectively on April 20<sup>th</sup> and April 21<sup>st</sup> at 08:00 UTC.
